# Supplementary material for: P38 kinases mediate NLRP1 inflammasome activation after ribotoxic stress response and virus infection
Source: PubMed Central journal article supplement (PMC9623368; doi:10.1084/jem.20220837), 2022-10-31

**Figure 1G**

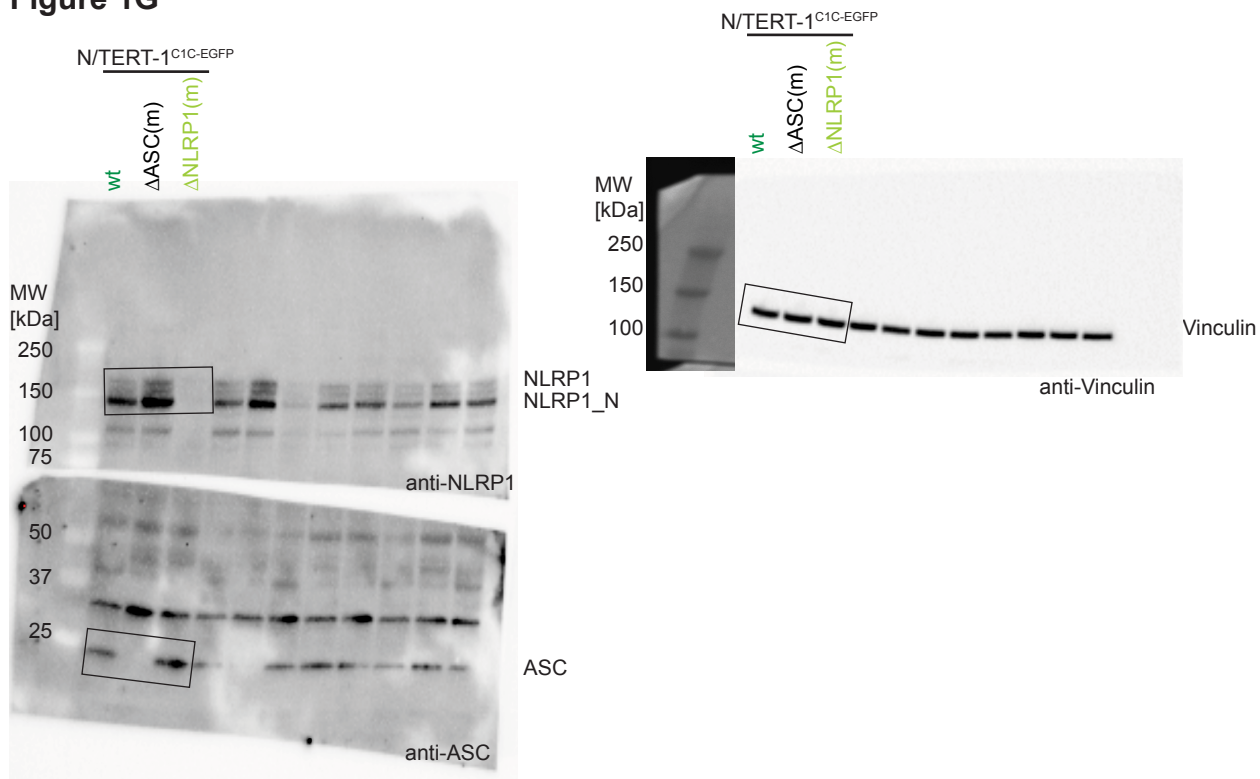

Supplement: JEM_20220837_SourceDataF1.pdf [file JEM_20220837_SourceDataF1.pdf]
