# Supplementary material for: P38 kinases mediate NLRP1 inflammasome activation after ribotoxic stress response and virus infection
Source: PubMed Central journal article supplement (PMC9623368; doi:10.1084/jem.20220837), 2022-10-31

Figure S5A

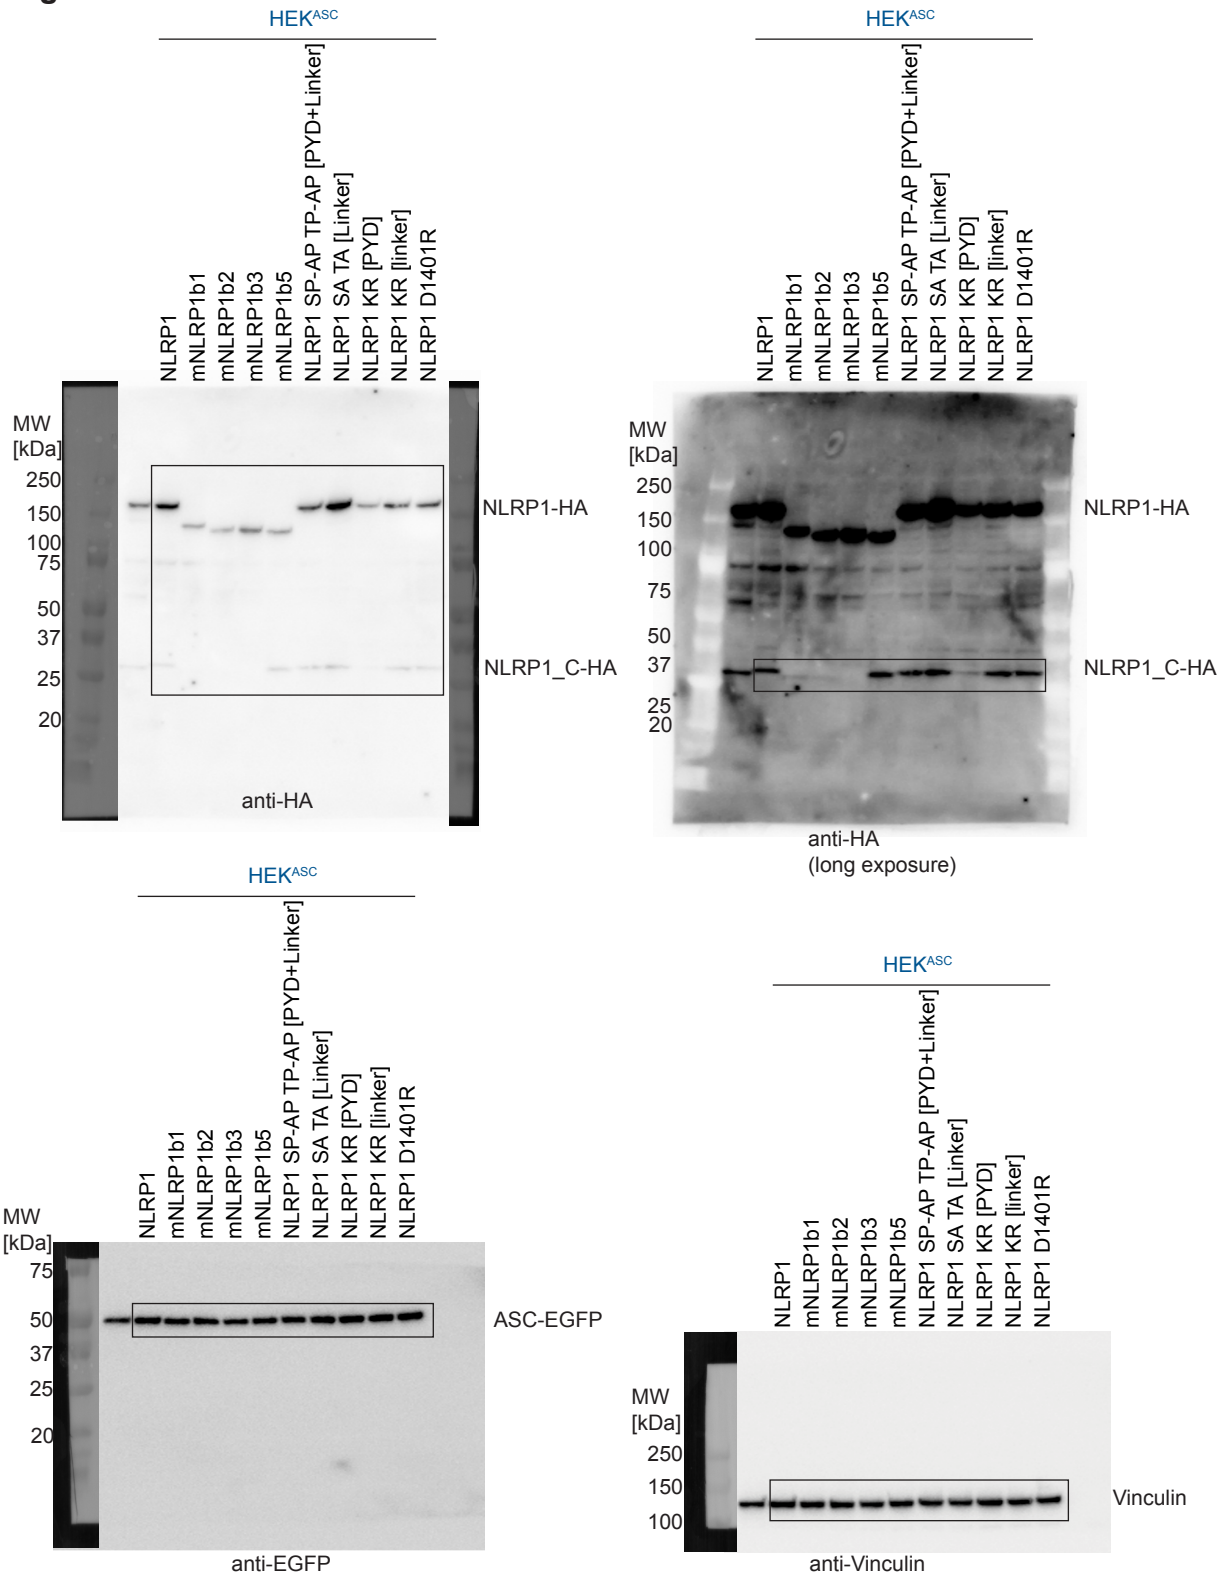

Figure S5C

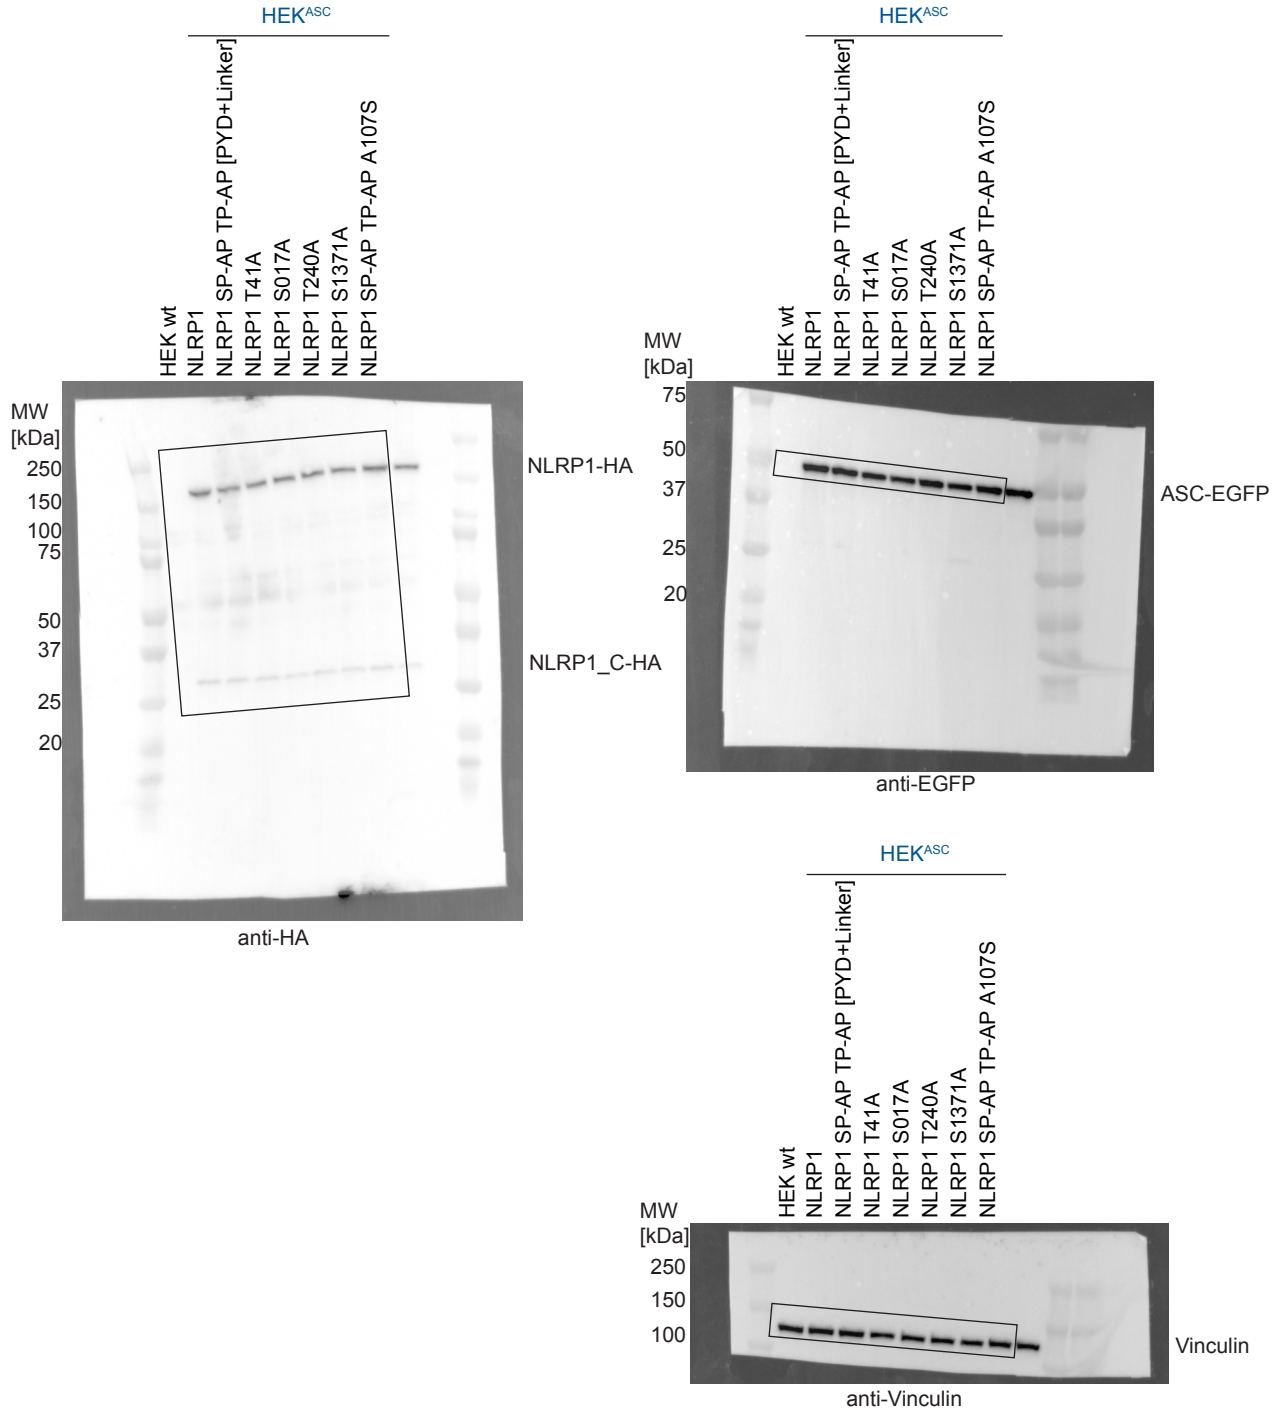

Figure S5D

N/TERT-1<sup>C1C</sup>-EGFP  $\Delta$ NLRP1(m)

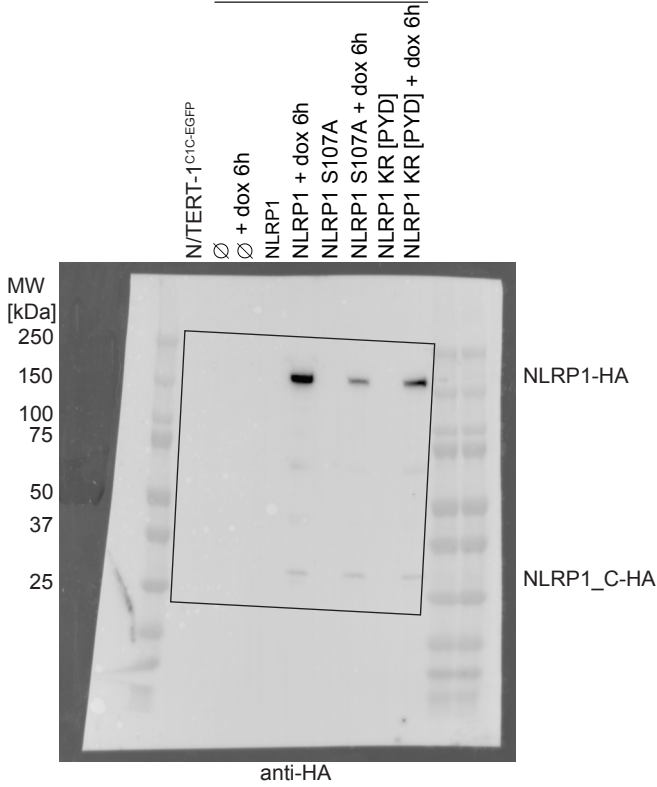

N/TERT-1<sup>C1C</sup>-EGFP  $\Delta$ NLRP1(m)

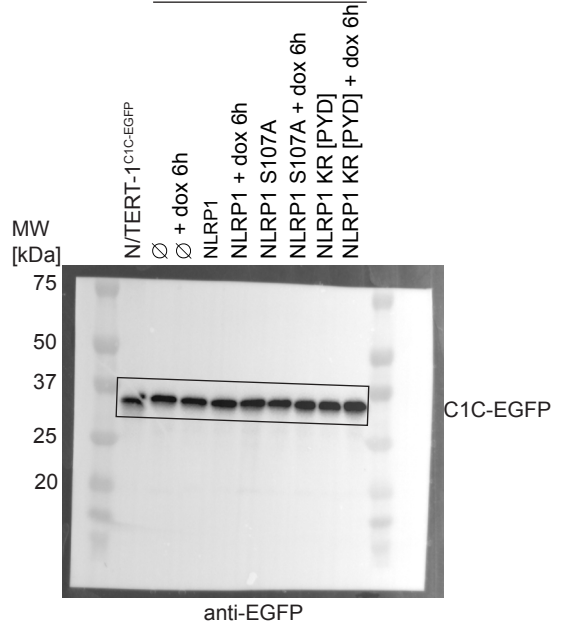

N/TERT-1<sup>C1C</sup>-EGFP  $\Delta$ NLRP1(m)

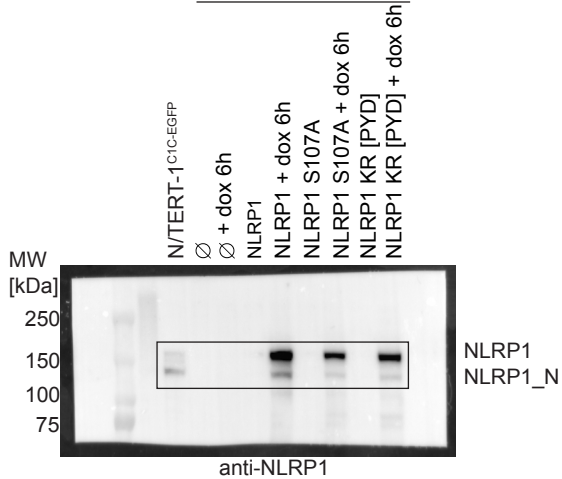

N/TERT-1<sup>C1C</sup>-EGFP  $\Delta$ NLRP1(m)

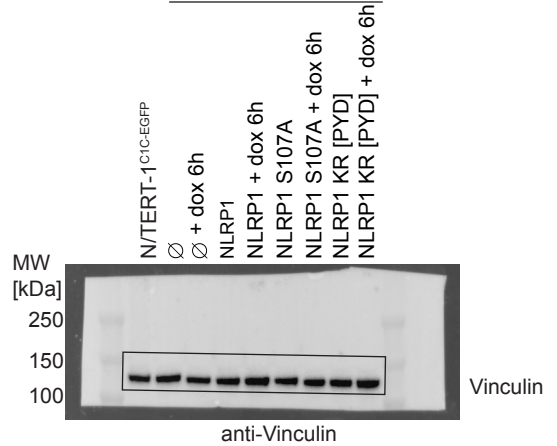

Supplement: JEM_20220837_SourceDataFS5.pdf [file JEM_20220837_SourceDataFS5.pdf]
